# Supplementary material for: Cardiovascular efficacy of liraglutide and semaglutide in individuals with diabetes and peripheral artery disease
Source: PubMed Central journal article supplement — Diabetes Obes Metab. 2022 Apr 11;24(7):1288–99. doi: 10.1111/dom.14700 (PMC9325529; doi:10.1111/dom.14700), 2022-04-11
Supplement: DOM-24-1288-s001.pdf [file DOM-24-1288-s001.pdf]

**Cardiovascular efficacy of liraglutide and semaglutide in individuals with diabetes and peripheral artery disease**

Subodh Verma, Mohammed Al-Omran, Lawrence A. Leiter, C. David Mazer, Søren Rasmussen, Hans A. Saevereid, Maria Sejersten Ripa, Marc P. Bonaca

**SUPPLEMENTARY MATERIAL**

**Supplementary Figure S1: Venn diagram of number (%) of patients according to PAD, CAD and cerebrovascular disease. A) LEADER; B) SUSTAIN 6.**

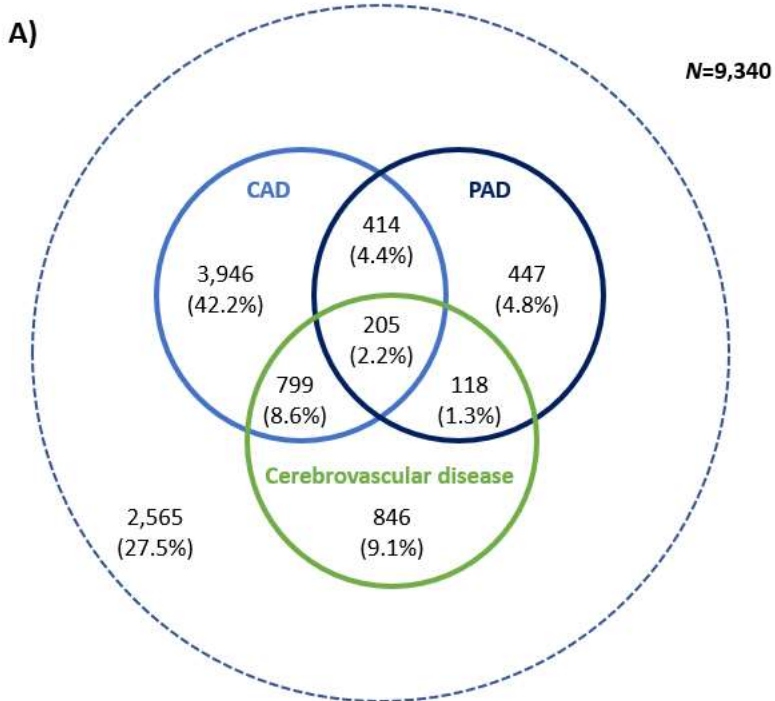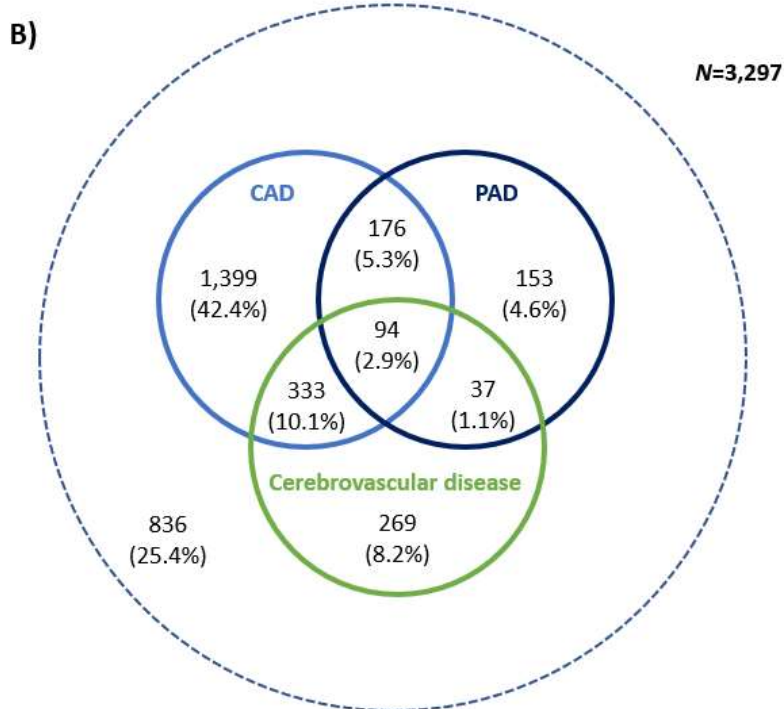

CAD, coronary artery disease; *N*, number of patients; PAD, peripheral artery disease.

**Supplementary Table S1: Demographics and baseline characteristics of LEADER trial participants by history of PAD.**

|                                                | <b>PAD at baseline<br/>(N=1184)</b> | <b>No PAD at baseline<br/>(N=8156)</b> |
|------------------------------------------------|-------------------------------------|----------------------------------------|
| Age (years), mean (SD)                         | 65.4 (7.4)                          | 64.1 (7.2)                             |
| Sex, female                                    | 439 (37.1)                          | 2898 (35.5)                            |
| HbA1c, %, mean (SD)                            | 8.7 (1.5)                           | 8.7 (1.5)                              |
| Duration of diabetes, years, mean (SD)         | 14.0 (8.4)                          | 12.6 (7.9)                             |
| Weight, kg, mean (SD)                          | 88.2 (19.4)                         | 92.3 (21.2)                            |
| Body mass index, kg/m <sup>2</sup> , mean (SD) | 31.4 (5.5)                          | 32.7 (6.4)                             |
| Systolic blood pressure, mmHg, mean (SD)       | 136.5 (18.1)                        | 135.8 (17.7)                           |
| Diastolic blood pressure, mmHg, mean (SD)      | 75.9 (10.1)                         | 77.3 (10.2)                            |
| LDL-C, mmol/L, mean (SD)                       | 2.4 (1.0)                           | 2.3 (0.9)                              |
| HDL-C, mmol/L, mean (SD)                       | 1.2 (0.3)                           | 1.2 (0.3)                              |
| Current or previous smoker                     | 776 (65.5)                          | 4694 (57.6)                            |
| Renal impairment                               |                                     |                                        |
| Normal                                         | 403 (34.0)                          | 2872 (35.2)                            |
| Mild                                           | 469 (39.6)                          | 3438 (42.2)                            |
| Moderate or severe                             | 312 (26.4)                          | 1846 (22.6)                            |
| eGFR, mL/min/1.73m <sup>2</sup> , mean (SD)    | 78.7 (27.0)                         | 80.6 (27.4)                            |
| History of hypertension                        | 1075 (90.8)                         | 7436 (91.2)                            |
| History of arrhythmia                          | 211 (17.8)                          | 1228 (15.1)                            |
| History of ischemic stroke                     | 132 (11.1)                          | 906 (11.1)                             |
| History of myocardial infarction               | 311 (26.3)                          | 2496 (30.6)                            |
| History of heart failure, NYHA class II–III    | 197 (16.6)                          | 1108 (13.6)                            |
| Prior CABG                                     | 212 (17.9)                          | 1319 (16.2)                            |
| History of PCI                                 | 286 (24.2)                          | 2282 (28.0)                            |
| <b>PAD history</b>                             |                                     |                                        |
| PAD diagnosed by:                              |                                     |                                        |
| Ankle-brachial index <0.9                      | 488 (41.2)                          | —                                      |
| Ultrasonography                                | 345 (29.1)                          | —                                      |
| Angiography                                    | 309 (26.1)                          | —                                      |
| PAD severity                                   |                                     |                                        |
| Claudication                                   | 649 (54.8)                          | —                                      |
| >50% stenosis of the peripheral arteries       | 284 (24.0)                          | —                                      |
| Prior revascularization                        | 295 (24.9)                          | —                                      |
| Medications at baseline                        |                                     |                                        |
| Insulin                                        | 578 (48.8)                          | 3591 (44.0)                            |
| Statins or other lipid-lowering therapy        | 859 (72.6)                          | 6220 (76.3)                            |
| Antiplatelet agents                            | 808 (68.2)                          | 5518 (67.7)                            |
| Antithrombotic medication                      | 90 (7.6)                            | 533 (6.5)                              |
| Antihypertensive therapy                       | 1061 (89.6)                         | 7570 (92.8)                            |

Data are  $N$  (%), unless otherwise stated. Data for cardiovascular history and complications are from the screening visit. Renal impairment and eGFR data are based on eGFR calculated using the Modification of Diet in Renal Disease equation.

CABG, coronary artery bypass graft; eGFR, estimated glomerular filtration rate; HbA1c, glycated hemoglobin; HDL-C, high density lipoprotein cholesterol; LDL-C, low density lipoprotein cholesterol;  $N$ , number of patients; NYHA, New York Heart Association; PAD, peripheral artery disease; PCI, percutaneous coronary intervention; SD, standard deviation.

**Supplementary Table S2: Demographics and baseline characteristics of SUSTAIN 6 participants by history of PAD.**

|                                                | <b>PAD at baseline (N=460)</b> | <b>No PAD at baseline (N=2837)</b> |
|------------------------------------------------|--------------------------------|------------------------------------|
| Age (years), mean (SD)                         | 65.8 (7.2)                     | 64.5 (7.4)                         |
| Sex, female                                    | 156 (33.9)                     | 1139 (40.1)                        |
| HbA1c, %, mean (SD)                            | 8.7 (1.5)                      | 8.7 (1.5)                          |
| Duration of diabetes, years, mean (SD)         | 15.3 (8.4)                     | 13.7 (8.0)                         |
| Weight, kg, mean (SD)                          | 90.6 (19.3)                    | 92.3 (20.8)                        |
| Body mass index, kg/m <sup>2</sup> , mean (SD) | 32.1 (5.7)                     | 32.9 (6.3)                         |
| Systolic blood pressure, mmHg, mean (SD)       | 136.9 (17.1)                   | 135.4 (17.1)                       |
| Diastolic blood pressure, mmHg, mean (SD)      | 76.3 (9.9)                     | 77.2 (10.0)                        |
| LDL-C, mmol/L, mean (SD)                       | 2.3 (1.0)                      | 2.3 (1.0)                          |
| HDL-C, mmol/L, mean (SD)                       | 1.2 (0.3)                      | 1.2 (0.3)                          |
| Current or previous smoker                     | 301 (65.4)                     | 1502 (52.9)                        |
| Renal impairment                               |                                |                                    |
| Normal                                         | 128 (27.8)                     | 862 (30.4)                         |
| Mild                                           | 200 (43.5)                     | 1168 (41.2)                        |
| Moderate or severe                             | 130 (28.3)                     | 797 (28.1)                         |
| eGFR, mL/min/1.73m <sup>2</sup> , mean (SD)    | 76.3 (25.6)                    | 76.1 (26.7)                        |
| History of hypertension                        | 427 (92.8)                     | 2632 (92.8)                        |
| History of ischemic stroke                     | 50 (10.9)                      | 333 (11.7)                         |
| History of myocardial infarction               | 141 (30.7)                     | 931 (32.8)                         |
| History of heart failure, NYHA class II–III    | 93 (20.2)                      | 481 (17.0)                         |
| Prior CABG                                     | 97 (21.1)                      | 480 (16.9)                         |
| History of PCI                                 | 131 (28.5)                     | 881 (31.1)                         |
| PAD history                                    |                                |                                    |
| PAD diagnosed by:                              |                                |                                    |
| Ankle-brachial index <0.9                      | 132 (28.7)                     | —                                  |
| Ultrasonography                                | 190 (41.3)                     | —                                  |
| Angiography                                    | 122 (26.5)                     | —                                  |

|                                          |            |             |
|------------------------------------------|------------|-------------|
| PAD severity                             |            |             |
| Claudication                             | 254 (55.2) | —           |
| >50% stenosis of the peripheral arteries | 150 (32.6) | —           |
| Prior revascularization                  | 112 (24.3) | —           |
| Medications at baseline                  |            |             |
| Insulin                                  | 231 (50.2) | 1320 (46.5) |
| Statins or other lipid-lowering therapy  | 355 (77.2) | 2166 (76.3) |
| Antiplatelet agents                      | 368 (80.0) | 2041 (71.9) |
| Antithrombotic medication                | 35 (7.6)   | 160 (5.6)   |
| Antihypertensive therapy                 | 426 (92.6) | 2656 (93.6) |

Data are *N* (%), unless otherwise stated. Data for cardiovascular history and complications are from the screening visit. Renal impairment and eGFR data are based on eGFR calculated using the Modification of Diet in Renal Disease equation.

CABG, coronary artery bypass graft; eGFR, estimated glomerular filtration rate; HbA1c, glycated hemoglobin; HDL-C, high density lipoprotein cholesterol; LDL-C, low density lipoprotein cholesterol; *N*, number of patients; NYHA, New York Heart Association; PAD, peripheral artery disease; PCI, percutaneous coronary intervention; SD, standard deviation.

**Supplementary Table S3: Risk of CV events and mortality by history of PAD at baseline and randomized treatment group, adjusted for baseline variables.**

| Endpoint        | LEADER<br>HRs; liraglutide versus placebo |                    |                          | SUSTAIN 6<br>HRs; semaglutide versus placebo |                    |                          |
|-----------------|-------------------------------------------|--------------------|--------------------------|----------------------------------------------|--------------------|--------------------------|
|                 | PAD at baseline                           | No PAD at baseline | $P_{\text{interaction}}$ | PAD at baseline                              | No PAD at baseline | $P_{\text{interaction}}$ |
| MACE            | 0.76 [0.58–1.00]                          | 0.89 [0.79–1.00]   | 0.30                     | 0.59 [0.32–1.09]                             | 0.76 [0.58–0.99]   | 0.47                     |
| Nonfatal MI     | 0.53 [0.34–0.84]                          | 0.95 [0.80–1.13]   | 0.02                     | 0.86 [0.37–1.99]                             | 0.71 [0.47–1.09]   | 0.70                     |
| Nonfatal stroke | 1.06 [0.61–1.85]                          | 0.87 [0.69–1.10]   | 0.51                     | —                                            | —                  | —                        |
| CV death        | 0.91 [0.61–1.35]                          | 0.75 [0.61–0.91]   | 0.40                     | —                                            | —                  | —                        |
| Expanded MACE   | 0.84 [0.67–1.05]                          | 0.88 [0.80–0.97]   | 0.67                     | 0.54 [0.35–0.82]                             | 0.80 [0.65–0.98]   | 0.10                     |
| All-cause death | 0.93 [0.67–1.29]                          | 0.82 [0.71–0.96]   | 0.50                     | —                                            | —                  | —                        |

Data are HR [95% CI] for GLP-1 analog versus placebo, unless otherwise stated. Some adjusted data are not shown because of convergence issues arising due to few events.

CI, confidence interval; CV, cardiovascular; GLP-1, glucagon-like peptide-1; HR, hazard ratio; MACE, major adverse cardiovascular event; MI, myocardial infarction; PAD, peripheral artery disease.

**Supplementary Table S4: Changes from baseline in HbA1c, blood pressure and body weight in LEADER trial participants by history of PAD and randomized treatment group.**

|                                   | PAD at baseline (N=1184) |                    |                                          | No PAD at baseline (N=8156) |                     |                                          | <i>P</i> <sub>interaction</sub> |
|-----------------------------------|--------------------------|--------------------|------------------------------------------|-----------------------------|---------------------|------------------------------------------|---------------------------------|
|                                   | Liraglutide<br>(N=573)   | Placebo<br>(N=611) | Estimated treatment<br>contrast [95% CI] | Liraglutide<br>(N=4095)     | Placebo<br>(N=4061) | Estimated treatment<br>contrast [95% CI] |                                 |
| HbA1c, %                          | -1.05                    | -0.71              | -0.34<br>[-0.51; -0.18]                  | -1.18                       | -0.77               | -0.40<br>[-0.46; -0.34]                  | 0.51                            |
| Systolic blood<br>pressure, mmHg  | -0.88                    | -0.46              | -0.42<br>[-2.46; 1.62]                   | -1.52                       | -0.21               | -1.31<br>[-2.07; -0.54]                  | 0.43                            |
| Diastolic blood<br>pressure, mmHg | -1.52                    | -2.04              | 0.52<br>[-0.62; 1.66]                    | -0.69                       | -1.28               | 0.59<br>[0.16; 1.02]                     | 0.92                            |
| Body weight, kg                   | -2.44                    | -0.71              | -1.74<br>[-2.52; -0.96]                  | -2.78                       | -0.44               | -2.34<br>[-2.63; -2.05]                  | 0.16                            |

Data are estimated means for changes from baseline to the 3-year visit, unless otherwise stated.

CI, confidence interval; HbA1c, glycated hemoglobin; *N*, number of patients; PAD, peripheral artery disease.



**Supplementary Table S5: Changes from baseline in HbA1c, blood pressure and body weight in SUSTAIN 6 trial participants by history of PAD and randomized treatment group.**

|                                   | PAD at baseline (N=460) |                    |                                          | No PAD at baseline (N=2837) |                     |                                          | <i>P</i> <sub>interaction</sub> |
|-----------------------------------|-------------------------|--------------------|------------------------------------------|-----------------------------|---------------------|------------------------------------------|---------------------------------|
|                                   | Semaglutide<br>(N=230)  | Placebo<br>(N=230) | Estimated treatment<br>contrast [95% CI] | Semaglutide<br>(N=1418)     | Placebo<br>(N=1419) | Estimated treatment<br>contrast [95% CI] |                                 |
| HbA1c, %                          | -1.27                   | -0.19              | -1.08<br>[-1.32; -0.84]                  | -1.25                       | -0.44               | -0.81<br>[-0.91; -0.72]                  | 0.047                           |
| Systolic blood<br>pressure, mmHg  | -2.80                   | -2.41              | -0.39<br>[-2.99; 2.22]                   | -4.67                       | -2.49               | -2.18<br>[-3.23; -1.13]                  | 0.21                            |
| Diastolic blood<br>pressure, mmHg | -1.92                   | -1.66              | -0.26<br>[-1.76; 1.25]                   | -1.40                       | -1.56               | 0.17<br>[-0.44; 0.77]                    | 0.61                            |
| Body weight, kg                   | -4.81                   | -0.96              | -3.85<br>[-4.91; -2.79]                  | -4.13                       | -0.56               | -3.57<br>[-4.00; -3.14]                  | 0.63                            |

Data are estimated means for changes from baseline to the 2-year visit, unless otherwise stated.

CI, confidence interval; HbA1c, glycated hemoglobin; *N*, number of patients; PAD, peripheral artery disease.

**Supplementary Table S6: Serious adverse events and non-serious medical events of special interest in LEADER trial participants by history of PAD.**

|                                    | PAD at baseline        |                    |                   | No PAD at baseline      |                     |                   |
|------------------------------------|------------------------|--------------------|-------------------|-------------------------|---------------------|-------------------|
|                                    | Liraglutide<br>(N=573) | Placebo<br>(N=611) | Total<br>(N=1184) | Liraglutide<br>(N=4095) | Placebo<br>(N=4061) | Total<br>(N=8156) |
| Person-years of observation        | 2137                   | 2267               | 4404              | 15685                   | 15474               | 31159             |
| Events                             | 396 (69.1)             | 403 (66.0)         | 799 (67.5)        | 2513 (61.4)             | 2436 (60.0)         | 4949 (60.7)       |
| Serious adverse events             | 324 (56.5)             | 347 (56.8)         | 671 (56.7)        | 1996 (48.7)             | 2007 (49.4)         | 4003 (49.1)       |
| Medical events of special interest | 333 (58.1)             | 346 (56.6)         | 679 (57.3)        | 2045 (49.9)             | 1967 (48.4)         | 4012 (49.2)       |
| Severity                           |                        |                    |                   |                         |                     |                   |
| Severe                             | 226 (39.4)             | 244 (39.9)         | 470 (39.7)        | 1276 (31.2)             | 1289 (31.7)         | 2565 (31.4)       |
| Moderate                           | 245 (42.8)             | 257 (42.1)         | 502 (42.4)        | 1544 (37.7)             | 1430 (35.2)         | 2974 (36.5)       |
| Mild                               | 176 (30.7)             | 172 (28.2)         | 348 (29.4)        | 1059 (25.9)             | 1030 (25.4)         | 2089 (25.6)       |
| Missing                            | 0 (0.0)                | 0 (0.0)            | 0 (0.0)           | 3 (<0.1)                | 3 (<0.1)            | 6 (<0.1)          |

Data are N (%), unless otherwise stated. A serious adverse event was defined as an incident at any dose resulting in: death; a life-threatening experience; in-patient hospitalization or prolongation of existing hospitalization; a persistent or significant disability or incapacity; or a congenital anomaly or birth defect. Important medical events that did not result in death, were not life-threatening, or did not require hospitalization could be considered a serious adverse events when there was appropriate medical judgement that they could jeopardize the patient and could require medical or surgical intervention to prevent one of the outcomes listed in the definition. Predefined medical events of special interest included: acute coronary syndrome; cerebrovascular events; heart failure;

revascularization procedures; nephropathy (defined as new onset of macroalbuminuria or doubling of serum creatinine level and creatinine clearance per MDRD  $\leq 45$  mL/min/1.73m<sup>2</sup> or the need for continuous renal-replacement therapy [in the absence of an acute reversible cause] or death due to renal disease); diabetic foot ulcers; diabetic retinopathy (defined as the need for retinal photocoagulation or vitreous hemorrhage or diabetes-related blindness); neoplasms; pancreatitis or acute, severe and persistent abdominal pain leading to a suspicion of pancreatitis; acute gallstone disease; first confirmed episodes of calcitonin concentration increase  $\geq 20$  ng/L; thyroid disease; severe hypoglycemic events; immunogenicity events; adverse events leading to treatment discontinuation; medication errors; and suspected transmission of an infectious agent via a trial product.

MDRD, Modification of Diet in Renal Disease Study equation; *N*, number of patients; PAD, peripheral artery disease.

**Supplementary Table S7: Serious adverse events and non-serious medical events of special interest in SUSTAIN 6 trial participants by history of PAD.**

|                                    | PAD at baseline        |                    |                  | No PAD at baseline      |                     |                   |
|------------------------------------|------------------------|--------------------|------------------|-------------------------|---------------------|-------------------|
|                                    | Semaglutide<br>(N=230) | Placebo<br>(N=230) | Total<br>(N=460) | Semaglutide<br>(N=1418) | Placebo<br>(N=1419) | Total<br>(N=2837) |
| Person-years of observation        | 1381                   | 1380               | 2761             | 3369                    | 2486                | 5855              |
| Events                             | 112 (48.7)             | 117 (50.9)         | 229 (49.8)       | 616 (43.4)              | 592 (41.7)          | 1208 (42.6)       |
| Serious adverse events             | 71 (30.9)              | 85 (37.0)          | 156 (33.9)       | 379 (26.7)              | 435 (30.7)          | 814 (28.7)        |
| Medical events of special interest | 97 (42.2)              | 105 (45.7)         | 202 (43.9)       | 511 (36.0)              | 479 (33.8)          | 990 (34.9)        |
| Severity                           |                        |                    |                  |                         |                     |                   |
| Severe                             | 48 (20.9)              | 53 (23.0)          | 101 (22.0)       | 209 (14.7)              | 213 (15.0)          | 422 (14.9)        |
| Moderate                           | 55 (23.9)              | 69 (30.0)          | 124 (27.0)       | 343 (24.2)              | 337 (23.7)          | 680 (24.0)        |
| Mild                               | 49 (21.3)              | 52 (22.6)          | 101 (22.0)       | 273 (19.3)              | 254 (17.9)          | 527 (18.6)        |
| Missing                            | 0 (0.0)                | 0 (0.0)            | 0 (0.0)          | 0 (0.0)                 | 0 (0.0)             | 0 (0.0)           |

Data are *N* (%), unless otherwise stated. A serious adverse event was defined as an incident at any dose resulting in: death; a life-threatening experience; in-patient hospitalization or prolongation of existing hospitalization; a persistent or significant disability or incapacity; or a congenital anomaly or birth defect. Important medical events that did not result in death, were not life-threatening, or did not require hospitalization could be considered a serious adverse events when there was appropriate medical judgement that they could jeopardize the patient and could require medical or surgical intervention to prevent one of the outcomes listed in the definition. Predefined medical events of special interest included: neoplasms; pancreatitis or clinical suspicion of pancreatitis; acute gallstone

disease; thyroid disease; cardiac arrhythmia; acute renal failure; severe hypoglycemic episodes; immunogenicity events; medication errors concerning trial products; suspected transmission of an infectious agent via a trial product; adverse events leading to treatment discontinuation; fatal events; acute coronary syndrome; cerebrovascular events; coronary revascularization procedures; peripheral arterial revascularization procedures, heart failure requiring hospital admission; nephropathy (defined as new onset of persistent macroalbuminuria [ $>300$  mg/g/24 hours], or persistent doubling of serum creatinine level and creatinine clearance per MDRD  $\leq 45$  mL/min/1.73m<sup>2</sup>, or the need for continuous renal-replacement therapy [in the absence of an acute reversible cause], or death due to renal disease); and diabetic retinopathy (defined as the need for retinal photocoagulation, or treatment with intravitreal agents, or vitreous hemorrhage, or diabetes-related blindness).

MDRD, Modification of Diet in Renal Disease Study equation;  $N$ , number of patients; PAD, peripheral artery disease.
